# Supplementary material for: HRS1 Acts as a Negative Regulator of Abscisic Acid Signaling to Promote Timely Germination of Arabidopsis Seeds
Source: PubMed Central journal article supplement (PMC3335793; doi:10.1371/journal.pone.0035764), 2012-04-24
Supplement: pone.0035764.s003.pdf [file pone.0035764.s003.pdf]

**Table S1.** Oligonucleotide primers used in this work.

| Primer    | Sequence (5'-3')                   | Use                                                                                                                                                           |
|-----------|------------------------------------|---------------------------------------------------------------------------------------------------------------------------------------------------------------|
| abi1-2-LP | AGGAAACCCCTTATTGAAATTC             | Identification of <i>abi1-2</i> allele (use with LBa1)                                                                                                        |
| abi1-2-RP | CTCTGTTCTGCTGATCATCT               |                                                                                                                                                               |
| hab1-1-LP | ACAATGGCTTGTAGGTTGCTG              | Identification of <i>hab1-1</i> allele (use with LBa1)                                                                                                        |
| hab1-1-RP | GCTTCAGGTTCTGGTCTTGAAC             |                                                                                                                                                               |
| LBa1      | TGGTTCACGTAGTGGGCCATCG             | Identification of <i>abi1-2</i> and <i>hab1-1</i>                                                                                                             |
| abi3-F    | GCGATGAAGCAGCTTTTAAAGCGAATT        | Identification of <i>abi3-8</i> by dCAPS marker. The <i>EcoRI</i> digestion products are either 180 bp + 20 bp ( <i>abi3-8</i> ) or 200 bp (wild type allele) |
| abi3-R    | GGTGGAGGAACCCATGTTGAAG             |                                                                                                                                                               |
| abi4-F    | GTCACGTGCTCAGCTCAACTT              | Identification of <i>abi4-1</i> by dCAPS marker. The <i>NlaIV</i> digestion products are either 191 bp ( <i>abi4-1</i> ) or 161 bp + 30 bp (wild type allele) |
| abi4-R    | TTAAAAGGGATACCGTACGGAC             |                                                                                                                                                               |
| abi5-F    | GAGTCGTCCATGGCGCAAG                | Identification of <i>abi5-7</i> by dCAPS marker. The <i>BamHI</i> digestion products are either 207 bp ( <i>abi5-7</i> ) or 187 bp + 20 bp (wild type allele) |
| abi5-R    | GATTGTTATTATCTCCTCTGGGAT           |                                                                                                                                                               |
| pHRS1-F   | AATGAGCTCAGCTAGTTTTTCGAGTTCAAGCTAG | Amplifying the 5' flanking sequence of <i>HRS1</i> (1617 bp) for preparing complementation and <i>pHRS1::HRS1-GFP</i> lines                                   |
| pHRS1-R   | ATTAAGCTTGATGATACTTTAGGGACTTAATTT  |                                                                                                                                                               |
| HRS1-F1   | TTAAAGCTTATGATTAATAAAGTTCAGC       | Amplifying the genomic sequence of <i>HRS1</i> (1615 bp) for preparing complementation lines                                                                  |
| HRS1-R1   | TTAGGATCCTTAATTATCTTGACGTA         |                                                                                                                                                               |
| HRS1-F2   | TTAAAGCTTATGATTAATAAAGTTCAGC       | Amplifying the cDNA sequence of <i>HRS1</i> (1032 bp) for constructing <i>pHRS1::HRS1-GFP</i> transgenic lines                                                |
| HRS1-R2   | TAAGTCGACCATTATCTTGACGTAATG        |                                                                                                                                                               |
| HRS1-F3   | AACATTTTCGTAGTCGTCGGTG             | Specific for <i>HRS1</i> transcripts, used in quantitative PCR assay                                                                                          |
| HRS1-R3   | ACGGGTAGAAGAAGACATCGC              |                                                                                                                                                               |
| ABI3-F    | ACAGGGATGGAAACCAGAAAA              | Specific for <i>ABI3</i> transcripts, used in quantitative PCR assay                                                                                          |
| ABI3-R    | TTCCAAACACGAGAGGTTCC               |                                                                                                                                                               |
| ABI4-F    | AGGGACAATTCCAACACCAAC              | Specific for <i>ABI4</i> transcripts, used in quantitative PCR assay                                                                                          |
| ABI4-R    | CCACTTCCTCCTTGTTCCCTG              |                                                                                                                                                               |
| ABI5-F    | AACCTAATCCAAACCCGAACC              | Specific for <i>ABI5</i> transcripts, used in quantitative PCR assay                                                                                          |
| ABI5-R    | TACCCTCCTCCTGTCTCT                 |                                                                                                                                                               |
| ACT8-F    | ATATGCCTATCTACGAGGGTTTC            | Specific for <i>ACT8</i> transcripts, used in quantitative PCR assay as internal standard                                                                     |
| ACT8-R    | ATACAATTTCCCGTTCTGTGT              |                                                                                                                                                               |

The underlined nucleotides form *SacI* (GAGCTC), *HindIII* (AAGCTT), *BamHI* (GGATCC) or *SalI* (GTCGAC) restriction digestion sites.
